# Supplementary material
Source: publisher figshare collection journal article supplement (https://geolsoc.figshare.com/ndownloader/files/5425730)
Supplement: Supplementary file 1 [file 5425730]

Fizh	Fizh	Fizh	Fizh	Fizh	Fizh	Fizh	Fizh	Fizh	Fizh	Fizh	Fizh	Fizh	Fizh	Fizh	Fizh	Fizh	Fizh	Fizh	Fizh	Fizh	Fizh	Fizh	Fizh	Fizh	Fizh	Fizh	Fizh	Fizh	Fizh	Fizh	Fizh	Fizh	Fizh	Fizh	Fizh	Fizh	Fizh	Fizh	Fizh	Fizh	Fizh	Fizh	Fizh	Fizh	Fizh	Fizh	Fizh	Fizh	Fizh
	1	2	3	4	5	6	7	8	9	10	11	12	13	14	15	16	17	18	19	20	21	22	23	24	25	26	27	28	29	30	31	32	33	34	35	36	37	38	39	40	41	42	43	44	45	46	47	48	49
SiO2	0.00	0.00	0.00	0.00	0.00	0.00	0.00	0.00	0.00	0.00	0.00	0.06	0.00	0.00	0.27	0.00	0.00	0.00	0.00	0.35	0.00	0.00	0.00	0.00	0.00	0.00	0.00	0.00	0.00	0.00	0.00	0.00	0.00	0.00	0.00	0.00	0.00	0.00	0.00	0.00	0.00	0.00	0.00	0.00	0.00	0.00	0.00	0.00	0.00
TiO2	0.08	0.27	0.26	0.27	0.06	0.08	0.36	0.31	0.13	0.09	0.16	0.18	0.15	0.06	0.02	0.09	0.22	0.19	0.07	0.08	0.67	0.08	0.04	0.09	0.25	0.22	0.14	0.08	0.06	0.10	0.22	0.06	0.09	0.10	0.20	0.18	0.06	0.14	0.07	0.00	0.14	0.21	0.07	0.12	0.32	0.10	0.17	0.24	0.07
Al2O3	24.62	15.05	15.15	8.68	38.05	16.11	3.95	14.93	10.66	17.00	11.51	12.30	16.45	23.46	15.87	27.02	11.55	16.09	16.12	21.57	14.61	20.13	23.85	21.58	12.97	10.63	22.13	18.44	16.11	17.39	12.30	18.65	22.57	20.24	11.58	15.49	21.37	13.24	25.26	32.16	16.02	11.80	19.44	19.92	15.27	17.16	20.75	10.56	20.61
Cr2O3	42.85	51.78	50.91	53.32	29.99	50.55	53.71	50.22	52.07	48.31	53.49	54.07	46.78	43.25	51.09	40.54	54.47	51.39	48.13	45.41	41.34	45.20	44.94	44.44	51.87	56.44	42.67	45.59	49.81	50.02	54.76	48.77	43.10	47.47	52.41	49.24	43.53	48.49	42.52	33.71	47.47	52.80	47.99	46.80	47.50	51.09	42.45	55.94	46.28
FeO*	19.59	21.86	22.12	27.99	16.86	22.40	37.54	23.13	27.63	24.10	24.36	21.32	27.71	20.54	21.16	18.59	24.06	19.60	25.16	19.93	34.17	21.97	18.92	21.91	25.07	21.80	24.07	26.01	22.21	21.84	20.87	20.27	22.72	20.36	26.86	26.36	22.97	28.67	17.74	21.04	27.69	25.85	20.53	20.55	27.07	21.81	25.16	22.14	20.79
MnO	0.26	0.27	0.27	0.38	0.14	0.36	0.63	0.25	0.38	0.32	0.33	0.23	0.33	0.28	0.28	0.24	0.34	0.20	0.31	0.26	0.38	0.27	0.30	0.29	0.40	0.39	0.31	0.33	0.22	0.29	0.31	0.23	0.26	0.29	0.40	0.38	0.30	0.35	0.25	0.17	0.42	0.39	0.24	0.26	0.34	0.34	0.31	0.38	0.36
MgO	12.37	10.06	9.83	8.04	14.70	9.65	3.34	10.25	8.12	9.22	8.50	10.67	8.10	11.55	10.75	12.74	8.76	11.10	9.02	11.94	7.84	10.78	12.12	10.31	8.78	9.94	9.93	8.24	10.16	9.25	10.89	10.79	10.70	11.22	7.93	8.24	10.75	8.67	13.02	11.39	6.43	8.36	10.67	10.72	9.01	9.16	9.29	9.40	10.39
CaO	0.00	0.00	0.00	0.01	0.00	0.00	0.02	0.00	0.00	0.00	0.00	0.03	0.00	0.02	0.05	0.00	0.01	0.00	0.00	0.14	0.03	0.02	0.00	0.00	0.02	0.00	0.00	0.00	0.00	0.00	0.00	0.02	0.04	0.00	0.02	0.03	0.00	0.00	0.05	0.00	0.00	0.01	0.02	0.02	0.03	0.03	0.00	0.07	0.00
Na2O	0.03	0.08	0.10	0.03	0.02	0.03	0.07	0.06	0.04	0.05	0.06	0.04	0.04	0.00	0.06	0.03	0.06	0.04	0.04	0.02	0.07	0.02	0.01	0.05	0.07	0.03	0.01	0.01	0.07	0.01	0.03	0.03	0.00	0.00	0.04	0.04	0.04	0.04	0.02	0.02	0.07	0.04	0.02	0.06	0.03	0.03	0.04	0.07	0.05
K2O	0.02	0.03	0.04	0.03	0.03	0.03	0.04	0.03	0.03	0.02	0.01	0.02	0.03	0.01	0.05	0.03	0.04	0.04	0.03	0.02	0.02	0.03	0.02	0.01	0.02	0.03	0.02	0.04	0.02	0.03	0.04	0.01	0.02	0.03	0.01	0.01	0.02	0.03	0.04	0.03	0.03	0.03	0.02	0.02	0.01	0.02	0.02	0.04	0.03
P2O3	0.00	0.00	0.00	0.00	0.00	0.00	0.02	0.00	0.05	0.00	0.00	0.00	0.00	0.00	0.00	0.00	0.07	0.00	0.00	0.04	0.00	0.00	0.00	0.00	0.00	0.00	0.00	0.00	0.00	0.00	0.00	0.00	0.00	0.00	0.00	0.00	0.00	0.00	0.06	0.02	0.00	0.00	0.07	0.00	0.00	0.00	0.08	0.10	0.00
NiO	0.00	0.00	0.00	0.00	0.10	0.00	0.00	0.00	0.00	0.00	0.00	0.00	0.00	0.06	0.00	0.14	0.07	0.00	0.00	0.00	0.22	0.05	0.07	0.00	0.00	0.00	0.00	0.00	0.00	0.00	0.00	0.00	0.00	0.00	0.00	0.00	0.11	0.05	0.00	0.00	0.00	0.00	0.00	0.18	0.06	0.00	0.05	0.00	0.00
Total	99.82	99.38	98.68	98.74	99.94	99.20	99.67	99.16	99.10	99.12	98.43	98.91	99.59	99.22	99.58	99.44	99.64	98.63	98.88	99.75	99.36	98.54	100.26	98.67	99.44	99.48	99.28	98.73	98.67	98.93	99.42	98.83	99.50	99.70	99.46	99.96	99.16	99.69	99.02	98.53	98.25	99.50	99.06	98.64	99.64	99.74	98.31	98.93	98.57
Mg#	0.565	0.486	0.478	0.407	0.628	0.468	0.177	0.495	0.407	0.447	0.426	0.522	0.394	0.536	0.518	0.578	0.433	0.534	0.440	0.557	0.385	0.512	0.555	0.488	0.432	0.490	0.467	0.401	0.493	0.448	0.530	0.515	0.499	0.526	0.395	0.401	0.506	0.426	0.595	0.514	0.321	0.415	0.507	0.510	0.437	0.441	0.445	0.468	0.495
Cr#	0.539	0.698	0.693	0.805	0.346	0.678	0.901	0.693	0.766	0.656	0.757	0.747	0.656	0.553	0.684	0.502	0.760	0.682	0.667	0.585	0.655	0.601	0.558	0.580	0.729	0.781	0.564	0.624	0.675	0.659	0.749	0.637	0.562	0.611	0.752	0.681	0.577	0.711	0.530	0.413	0.665	0.750	0.623	0.612	0.676	0.666	0.579	0.780	0.601
Cr/(Cr+Al+Fe3+)	0.522	0.673	0.667	0.730	0.341	0.654	0.778	0.654	0.702	0.626	0.719	0.710	0.611	0.535	0.656	0.490	0.725	0.662	0.628	0.565	0.556	0.574	0.548	0.562	0.687	0.748	0.538	0.593	0.645	0.646	0.715	0.620	0.538	0.594	0.702	0.643	0.548	0.641	0.518	0.404	0.636	0.704	0.608	0.596	0.622	0.657	0.546	0.749	0.587
Al/(Cr+Al+Fe3+)	0.447	0.292	0.296	0.177	0.645	0.311	0.085	0.290	0.214	0.328	0.231	0.241	0.320	0.433	0.304	0.487	0.229	0.309	0.314	0.400	0.293	0.381	0.433	0.407	0.256	0.210	0.416	0.357	0.311	0.335	0.240	0.354	0.420	0.378	0.231	0.302	0.401	0.261	0.459	0.575	0.320	0.235	0.367	0.378	0.298	0.329	0.398	0.211	0.390
Fe3+/(Cr+Al+Fe3+)	0.030	0.036	0.038	0.093	0.014	0.035	0.137	0.056	0.084	0.046	0.050	0.049	0.068	0.032	0.040	0.023	0.046	0.028	0.058	0.035	0.151	0.045	0.019	0.032	0.057	0.042	0.046	0.050	0.044	0.019	0.045	0.026	0.043	0.028	0.066	0.055	0.051	0.098	0.023	0.021	0.044	0.061	0.025	0.027	0.079	0.014	0.056	0.040	0.023
	FeO*, total iron as FeO. Mg#, Mg/(Mg+Fe2+) atomic ratio. Cr#, Cr/(Cr+Al) atomic ratio.
[truncated: 51 more columns]
